# Supplementary material for: Production of individualized V gene databases reveals high levels of immunoglobulin genetic diversity
Source: PubMed Central journal article supplement (PMC5187446; doi:10.1038/ncomms13642), 2016-12-20
Supplement: ncomms13642-s1.pdf [file ncomms13642-s1.pdf]

# IgDiscover overview

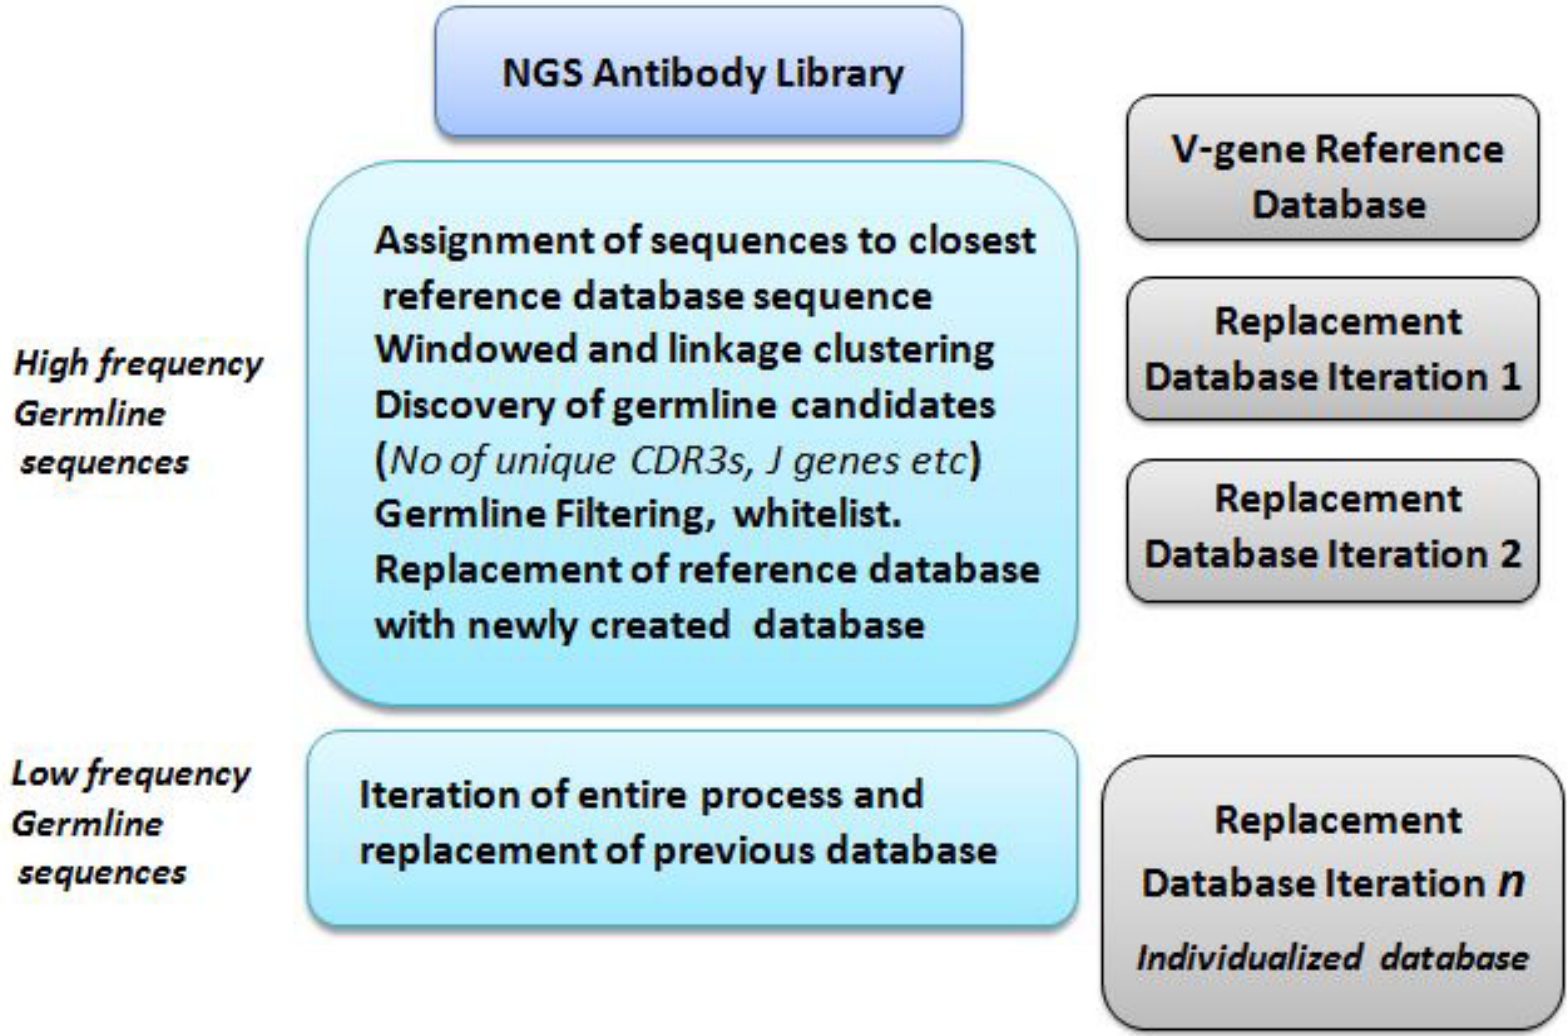

Supplementary Figure 1. Schematic overview of IgDiscover process

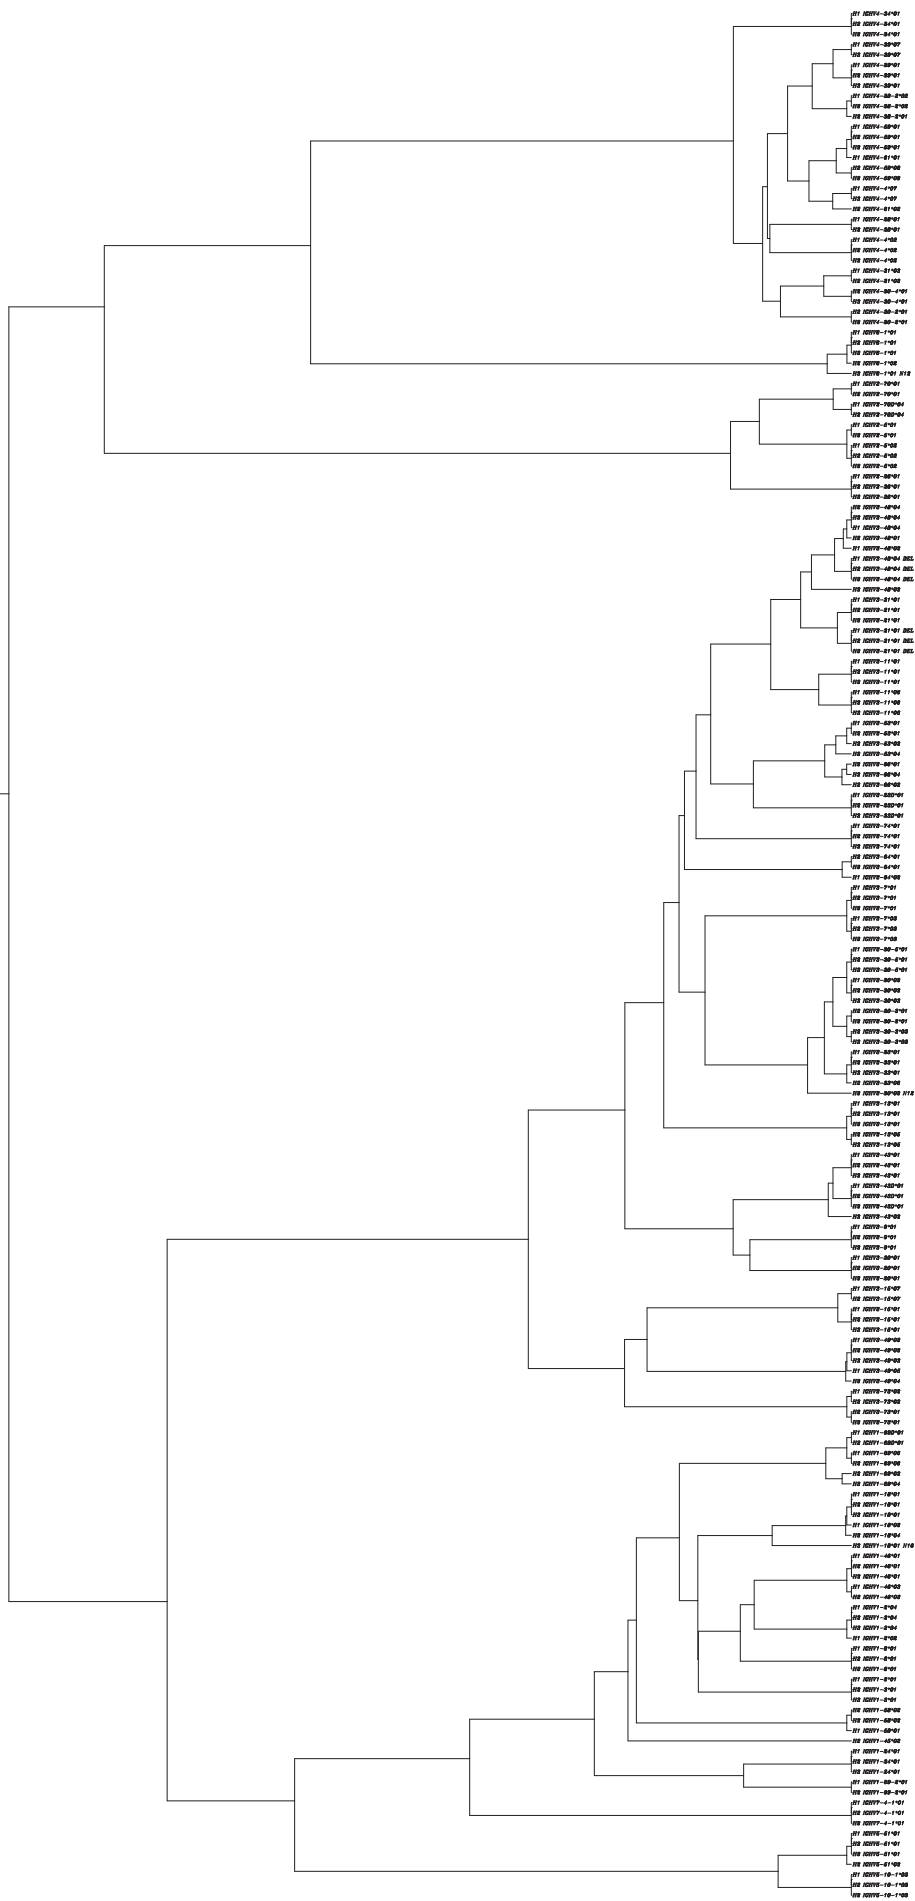

Supplementary Figure 2. Human individualized VH germline phylogenetic tree. Phylogenetic relationship between VH germline genes from the individualized V gene databases from individuals H1, H2, and H3.

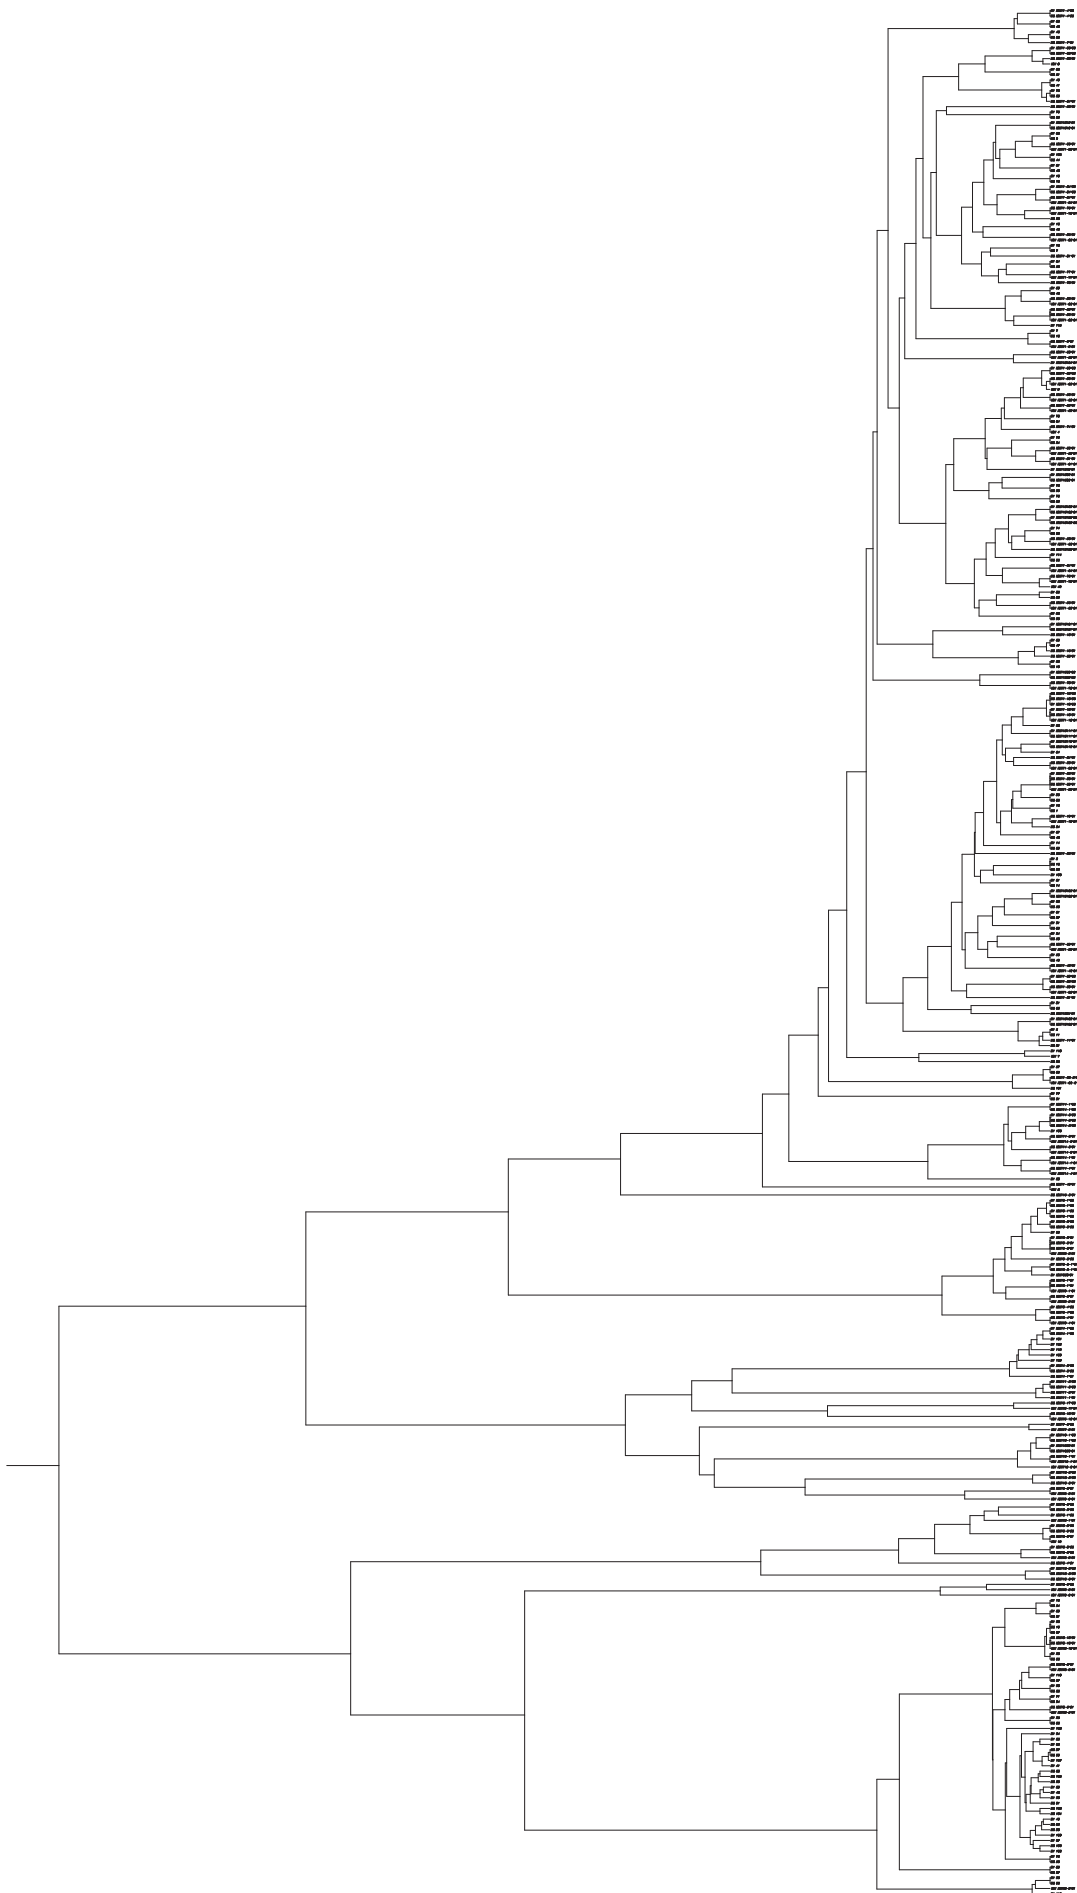

Supplementary Figure 3. Phylogenetic tree of 4 individualized mouse VH germline databases, from two BALB/c (M1 and M2) and two C57BL6 mice (M3 and ION)

Supplementary Table 1.

| Multiplex Primer           | Sequence                                                    |                             |
|----------------------------|-------------------------------------------------------------|-----------------------------|
| M_VH15F                    | CCTACACGACGCTCTCCGATCTGGACTGGATTTGGATCACTCTCCATCTGC         |                             |
| M14_F                      | CCTACACGACGCTCTCCGATCTCCTGATGGCAGTGGTTACAGGGGTCA            |                             |
| M_13F                      | CCTACACGACGCTCTCCGATCTGTGGCTCTTTTGAACGGTGTCCAGTG            |                             |
| M_12F                      | CCTACACGACGCTCTCCGATCTGGTGACAGTCCTTCTGGTAGCCTGTC            |                             |
| M_11F                      | CCTACACGACGCTCTCCGATCTCTCACGTCTCAACATGGAGTGGGAAGTGGAGCT     |                             |
| M_10F                      | CCTACACGACGCTCTCCGATCTATGCTGTTGGGGCTGAAGTGGGTT              |                             |
| M_9BF                      | CCTACACGACGCTCTCCGATCTGGCAGCAGCTCAAAGTATCCAAGC              |                             |
| M_9AF                      | CCTACACGACGCTCTCCGATCTGGCAGCTGCCAAAGTGCCAAAGC               |                             |
| M_8F                       | CCTACACGACGCTCTCCGATCTCCTGCTGCTGATTGTCCCTGCATATGTCCTGTC     |                             |
| M_7F                       | CCTACACGACGCTCTCCGATCTCACACATCCCTTACCATGGATTTTGGGCTGA       |                             |
| M_6F                       | CCTACACGACGCTCTCCGATCTCACCATGGACTTGAGACTGAGCTGTGCT          |                             |
| M_5F                       | CCTACACGACGCTCTCCGATCTCCAGTCACCATGTACTTCAGGCTCAGCTCAG       |                             |
| M_4F                       | CCTACACGACGCTCTCCGATCTCACACATCCCTTACCATGGATTTTGGGCTGA       |                             |
| M_3F                       | CCTACACGACGCTCTCCGATCTCCTGTTGACAGCCATTCCTGGTATCCTGT         |                             |
| M_2F                       | CCTACACGACGCTCTCCGATCTCCTGTCAGGAAGTGCAGGTGTCCTCT            |                             |
| M_1DF                      | CCTACACGACGCTCTCCGATCTGGTAKCAGCAGCTACAGGTGTCCACTC           |                             |
| M_1CF                      | CCTACACGACGCTCTCCGATCTCCTGTCAGGAAGTGCAGGTGTCCATTG           |                             |
| M_1BF                      | CCTACACGACGCTCTCCGATCTCCTGTCAGKAAATGCAGGTGTCCAMTC           |                             |
| M_1AF                      | CCTACACGACGCTCTCCGATCTCCTGTCAGGAAGTGCAGGTGTCCAATC           |                             |
| Hum_7F                     | CCTACACGACGCTCTCCGATCTGGTGGCAGCAGCAACAGGTGCCCACT            |                             |
| Hum_6F                     | CCTACACGACGCTCTCCGATCTGGCCTCCCATGGGGTGTCTGTC                |                             |
| Hum_5F                     | CCTACACGACGCTCTCCGATCTCTGGCTGTTCTCCAAGGAGTCTGTG             |                             |
| Hum_4F                     | CCTACACGACGCTCTCCGATCTGGTGGCRGCTCCCAGATGGGTCTGTC            |                             |
| Hum_3DF                    | CCTACACGACGCTCTCCGATCTGGGTTTTCTTKTKGCTATWTTAGAAGGTGTCCAGTG  |                             |
| Hum_3CF                    | CCTACACGACGCTCTCCGATCTGGATTTTCTTGCTGCTATTTTAAAAGGTGTCCAGTG  |                             |
| Hum_3BF                    | CCTACACGACGCTCTCCGATCTGGGTTTTCTTGTTGCTATTTTAAAAGGTGTCCARTG  |                             |
| Hum_3AF                    | CCTACACGACGCTCTCCGATCTGGGTTTTCTCGTTGCTCTTTTAAAGAGGTGTCCAGTG |                             |
| Hum_2BF                    | CCTACACGACGCTCTCCGATCTCCTGCTACTGACTGTCCCGTCTGGGTCTTATC      |                             |
| Hum_2AF                    | CCTACACGACGCTCTCCGATCTCCTGCTGCTGACCAYCCCTTCMTGGGTCTTGTC     |                             |
| Hum_1EF                    | CTACACGACGCTCTCCGATCTGCTGGCTGTAGCTCCAGGTGCTCACTC            |                             |
| Hum_1DF                    | CCTACACGACGCTCTCCGATCTGGTGGGAGCAGCAACARGWGCCCCTC            |                             |
| Hum_1CF                    | CCTACACGACGCTCTCCGATCTGGTGGCAGCAGCTACAGGTGTCCAGTC           |                             |
| Hum_1BF                    | CCTACACGACGCTCTCCGATCTGGTGGCAGCAGCCACAGGTGCCCACTC           |                             |
| Hum_1AF                    | CCTACACGACGCTCTCCGATCTGGTGGCAGCAGTCACAGATGCCTACTC           |                             |
| Race Primers               | Sequence                                                    |                             |
| SM_RACE1                   | CGTGAGCTGAGTACGACTCACTATAGCTTAC(N12)rGrGrGrGrG              |                             |
| F_Universal                | CGTGAGCTGAGTACGACTCACTATAGCTTC                              |                             |
| IgM_RevHuman               | CGGGGAATTCTCACAGGAGACGAGGGGGAAAAG                           |                             |
| IgM_RevRhesus              | GGGGCATTCTCACAGGAGACGAGGGGGAAAAG                            |                             |
| IgM_RevMouse               | GGGGGAAGACATTTGGGAAGGACTGACTCT                              |                             |
| IgK_RevRhesus              | GGGATAGAAGTTATTACAGCAGGCACACAACAGAG                         |                             |
| IgL_RevRhesus              | CACTGATCAGACACACTAGTGTGGCCTTG                               |                             |
| Genomic Validation Primers |                                                             |                             |
| ID                         | Forward primer                                              | Reverse primer              |
| VH1_23                     | GGCGTGGTCCACGTGTCACCTATCTTCTTCC                             | CCCCTCCATGAATGTTACTTACAGTG  |
| VH1_36                     | CCCACAGTAGGTTACACCCGGTAAAATCAGG                             | CACAGCTGCCTTCTCCCTCAGGGTTTC |
| VH1_53                     | GCCCAGAGAGCATCACACAACAACC                                   | GGCTGCCTTTCCCACTCTGTGAATG   |
| VH1_59                     | GGGTGGGGTGGCTTGGAGCTATGAAATACC                              | CGGCTTGATTGATGGCTGCCTTTCC   |
| VH1_61                     | GAGGGCAAGGCCAGGAAAGTTCAGG                                   | CAGCTGCCTCCTCCCTCAGGGTTTC   |
| VH2_12                     | GGCACCCACAGGAAACCACCACAC                                    | CTCCTGAGTCTGAGACCTGAGTGCAC  |
| VH2_25                     | GCTCCACCCTCCTCTGGGTTGAAAAGC                                 | CAGGTGGGGATAAGAAACC         |
| VH2_62                     | GCCTTGACTGAGAGGCATGGTCTGAAATG                               | GCGGTGGCTCACGCCTGTAATCC     |
| VH3_10B                    | CCGTCTCCCTCTGCTGATGAAAACCAGC                                | CCCTGGGGAAATTTGACATGAGG     |

|                 |                                       |                             |
|-----------------|---------------------------------------|-----------------------------|
| VH3_24          | GGACCCACCATGGAGTTGGGACTGAGCTGGGTTTTCC | CGTTCCTGGGGAAATTTGAC        |
| VH3_27          | CCAGGACGCTCTCATCTGCTCTGGTTCC          | GTCCCACATCCTGACAGGAAATCAGC  |
| VH3_29          | CCAGGACACTCTCATCTACTCTGTGCACAGCCTTC   | GCCTCCGGCAGCTGAGAAAGGAAACC  |
| VH3_30          | CTCCTGCAAGGCACAGTCACCTTATCTGG         | CACAGCCAAGAATGCTGGTGTTTTGC  |
| VH3_31          | GGGCCCTCCTTCTACTGATGAAAACCAACCC       | CTCCCTCCTTTCTTGCCTGCAGTGAGG |
| VH3_33          | CTCCTGCGGGCCTGTCATTTTATCTGG           | GCCCTGCACCACCTGCACTTGC      |
| VH3_41          | CCGGGACACTCTCCTCTGCTCTGA              | GTGCACCGGCTTCCGGGTTGAC      |
| VH3_42          | CTCCTGCAAGGCACAGTCACCTTATCTGG         | CTGCACCTGCTCCTGGGAC         |
| VH3_44          | GGGCCCTCCCTCTGCTGATGAAAACC            | CCCCACGTTCTTGCAGGGAGGTTTGTG |
| VH3_45          | CTGGGAGCCCCAGCCCTAGAATTCC             | CGAGGCCCTCTGGGGAAGTGTAG     |
| VH3_47          | GGACACTCTCATCCGCTCTGGACACTGCCTTC      | CCCGTTCCCGGCAGCTGAGAAAGG    |
| VH3_48          | CAGGCCTCTCACCCCAGAGCTTGCTAAATAG       | CCTCTATAGCACCGGCCTCTGGGTTG  |
| VH3_49          | GAGAGGAGCCCTAGCCTGGGATTCC             | CGCCCCTGTAGGAAGGTTTGTCTGC   |
| VH3_50          | GAGAGGAGGCCCAGACCTGGCATTTCAGG         | GTCCCACATCCTGACAGGAAATCAGC  |
| VH3_51          | GGTGTCCCACCCAGAACTTGCCATATAGTAGG      | GGCTGACTCTGATCAGTGGCTCCTGAG |
| VH3_52          | CCCCAGGACACTCCTCATGCTCTTAGC           | CCTGAGCAGCCCCTGCAGCTGATTTC  |
| VH3_54          | CCAGCCTGGGATTCCCAGGAGTTTCC            | CGCCCCTGCAGGGAGGTTTG        |
| VH3_55          | GCGTCTCACCCCAGAGCTTGCTGTATAGTAGG      | CCCTGAGTGTTCCTGCAGGGAGGTTTG |
| IGHVH3-21_human | GGTGATCAGGGCAAAGTGTTTATCACAGC         | CTGGAGAAGTTCCTGGGGAAATTTGA  |

## Supplementary Table 2.

### Effect of error rate on IgDiscover.

In order to get an impression of how sequencing error rate affects the discovery process, we created multiple versions of the H11M dataset (1380851 paired-end reads) by introducing additional substitution errors into the reads at rates between 0.1% and 3.0%. Results after running IgDiscover for three iterations are shown in Tab. X. An increase in error rate decreases the number of merged sequences and the number of IgBLAST-assigned sequences passing quality criteria to some degree, but the size of the final database decreases much more rapidly. This is to be expected since IgDiscover's germline filter relies on the presence of a minimum number of error-free copies of each V gene.

While this experiment simulates sequencing error rates being higher than a baseline, we observe that the size of the database seems to plateau between 0.0% and 0.5%. By extrapolation towards lower sequencing error rates, we hypothesize that only a small number of extra V genes would be detected in this case.

| Extra substitutions | Merged sequences | IgBLAST assignments passing quality filtering | Size of final database |
|---------------------|------------------|-----------------------------------------------|------------------------|
| 0.0%                | 1257467          | 856946                                        | 68                     |
| 0.1%                | 1257172          | 863010                                        | 69                     |
| 0.2%                | 1256929          | 861887                                        | 68                     |
| 0.5%                | 1256115          | 838662                                        | 65                     |
| 1.0%                | 1254533          | 777919                                        | 58                     |
| 2.0%                | 1251246          | 659878                                        | 42                     |
| 3.0%                | 1247623          | 560203                                        | 6                      |
